# Supplementary material
Source: PubMed Central journal article supplement (PMC3753996)
Supplement: JVI.01313-13_zjv999098095so1.pdf [file JVI.01313-13_zjv999098095so1.pdf]

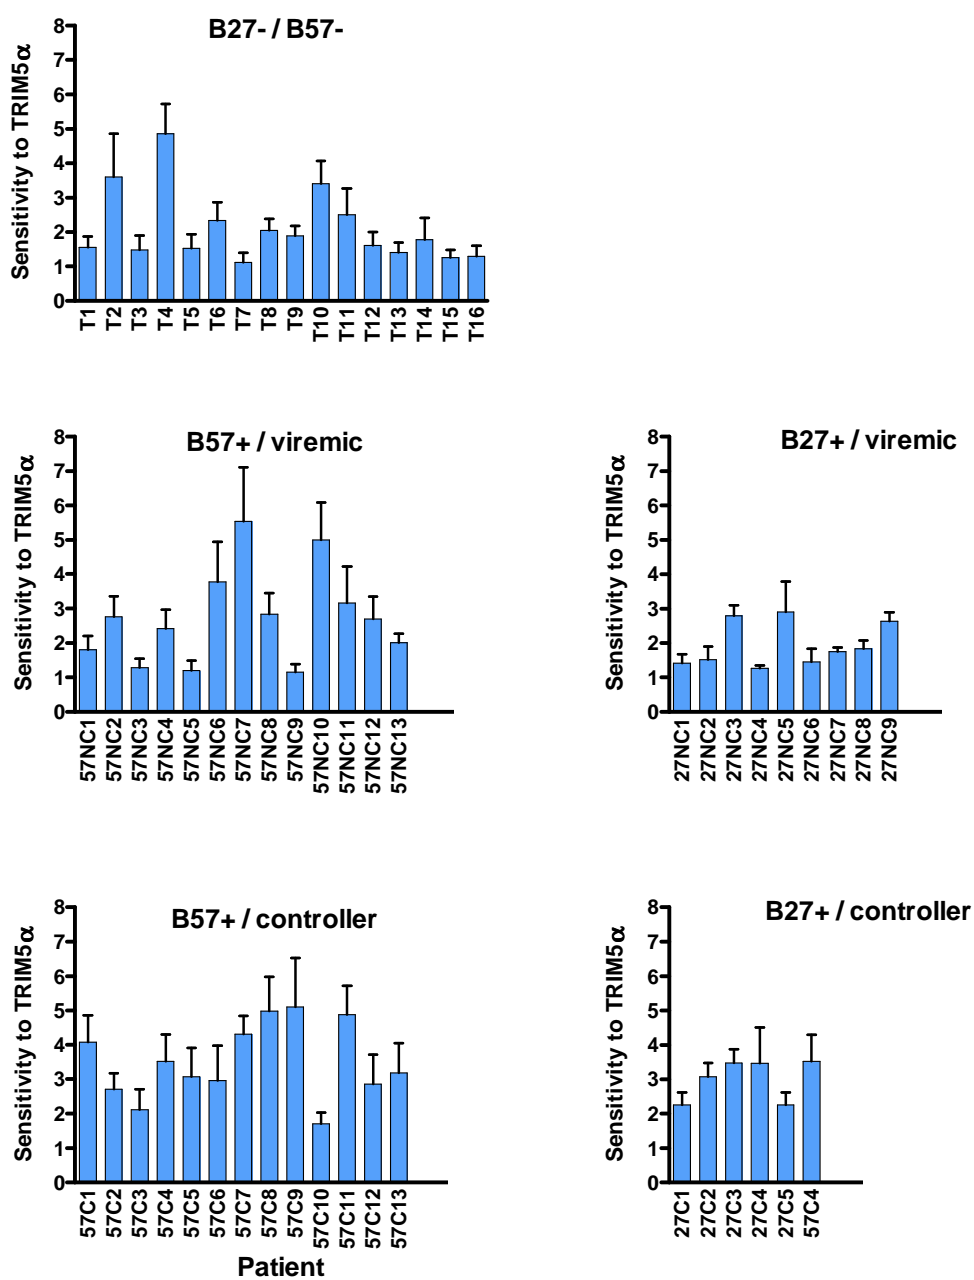

**Figure S1. Sensitivity to hTRIM5 $\alpha$  of recombinant viruses from individual patients.**

Sensitivity to hTRIM5 $\alpha$  was determined by measuring single-cycle infectivity using a luciferase-based assay after infection of U373-X4 cells in which hTRIM5 $\alpha$  activity had been inhibited by stable overexpression of untagged hTRIM5 $\gamma$  (U373-X4-TRIM5 $\gamma$ ) and in U373-X4 cells that express physiological levels of hTRIM5 $\alpha$  (U373-X4-lacZ) and determining the ratio of these results. Results for viruses from the indicated patient groups are shown as the mean  $\pm$  SD.

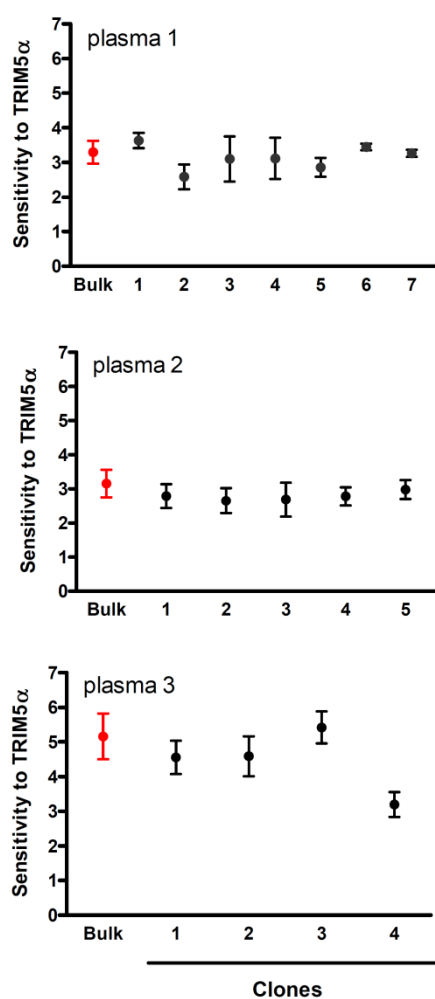

**Figure S2. Comparison of hTRIM5 $\alpha$  sensitivity of recombinant viruses generated using bulk amplification products and amplification products of individual clonal sequences from the same plasma sample.** RNA was extracted from plasma of HIV-1 infected patients containing 2.6 (plasma 1), 1.7 (plasma 2) and 4.6 (plasma 3) log<sub>10</sub> copies RNA/ml and used to amplify by nested RT-PCR a viral sequence that spans the region coding CA and containing  $\approx$ 100 bp upstream and downstream of this region. A portion of the bulk amplification products were saved, and the remainder A-tailed and ligated into the pCR2.1-TOPO vector (Invitrogen) according to the manufacturer's instructions. The same sequence was then amplified using plasmid DNA from individual clones. Amplification products from the bulk reaction (red symbols) and individual clones (black symbols) were used to generate recombinant viruses, and viral sensitivity to hTRIM5 $\alpha$  was determined as described in the Materials and Methods. Results are the mean  $\pm$  SEM for results of 5 (plasmas 1 and 2) or 4 (plasma 3) independent experiments.

Table S1. Clinical characteristics\*

| Patient                  | Sex | Age<br>(years) | Viral Load<br>(copies/ml) | CD4+<br>T-cells/ $\mu$ l | Viral<br>Subtype | HLA-B<br>Genotype | TRIM5 $\alpha$<br>Sensitivity |  |
|--------------------------|-----|----------------|---------------------------|--------------------------|------------------|-------------------|-------------------------------|--|
| <b>B27- / B57-</b>       |     |                |                           |                          |                  |                   |                               |  |
| T1                       | M   | 34             | 1877937                   | 175                      | AG               | 4202 7801         | 1.6                           |  |
| T2                       | M   | 32             | 28545                     | 324                      | A1               | 45 58             | 3.6                           |  |
| T3                       | M   | 29             | 429                       | 296                      | AG               | 42 44             | 1.5                           |  |
| T4                       | M   | 34             | 271                       | 556                      | B                | 8 61              | 4.9                           |  |
| T5                       | M   | 36             | 45600                     | 179                      | A1               | 53 81             | 1.5                           |  |
| T6                       | M   | 43             | 40102                     | 483                      | B                | 7 62              | 2.3                           |  |
| T7                       | M   | 38             | 140563                    | 62                       | AG               | 42 53             | 1.1                           |  |
| T8                       | M   | 39             | 10219                     | 466                      | AG               | 49 55             | 2.1                           |  |
| T9                       | M   | 48             | 23731                     | 580                      | B                | 7 44              | 1.9                           |  |
| T10                      | F   | 37             | 5020                      | NA                       | A1               | 42 53             | 3.4                           |  |
| T11                      | F   | 30             | 123893                    | 178                      | AG               | 3501 5101         | 2.5                           |  |
| T12                      | M   | 30             | 298332                    | 101                      | AG               | 5301 7801         | 1.6                           |  |
| T13                      | M   | 44             | 390396                    | 75                       | AG               | 1503 4202         | 1.4                           |  |
| T14                      | M   | 33             | 74500                     | 380                      | B                | 1402 4402         | 1.8                           |  |
| T15                      | F   | 54             | 89991                     | 61                       | AG               | 0702 1510         | 1.3                           |  |
| T16                      | F   | 57             | 43920                     | 376                      | AG               | 4901 4901         | 1.3                           |  |
| <b>B57+ / Viremic</b>    |     |                |                           |                          |                  |                   |                               |  |
| 57NC1                    | M   | 34             | 1908                      | NA                       | AG               | 63 5703           | 1.8                           |  |
| 57NC2                    | M   | 36             | 98050                     | 201                      | B                | 14 5701           | 2.8                           |  |
| 57NC3                    | M   | 35             | 2845                      | 1031                     | AG               | 37 5701           | 1.3                           |  |
| 57NC4                    | M   | 38             | 3908                      | 911                      | B                | 1402 5701         | 2.4                           |  |
| 57NC5                    | F   | 33             | 4385                      | 408                      | AG               | 5703 5703         | 1.2                           |  |
| 57NC6                    | M   | 31             | 43800                     | 604                      | B                | 42 5701           | 3.8                           |  |
| 57NC7                    | M   | 44             | 44188                     | 300                      | B                | 8 5701            | 5.5                           |  |
| 57NC8                    | F   | 33             | 71900                     | 205                      | AE               | 54 5701           | 2.8                           |  |
| 57NC9                    | M   | 58             | 144087                    | 49                       | AG               | 51 5701           | 1.2                           |  |
| 57NC10                   | M   | 28             | 156600                    | 383                      | B                | 51 5701           | 5.0                           |  |
| 57NC11                   | M   | 37             | 213514                    | 601                      | B                | 35 5701           | 3.2                           |  |
| 57NC12                   | M   | 44             | 380800                    | 86                       | B                | NA 57             | 2.7                           |  |
| 57NC13                   | M   | 60             | 946738                    | 10                       | B                | 8 5701            | 2.0                           |  |
| <b>B57+ / Controller</b> |     |                |                           |                          |                  |                   |                               |  |
| 57C1                     | F   | 42             | < 50                      | 448                      | B                | 1302 5702         | 4.1                           |  |
| 57C2                     | M   | 44             | < 63                      | 866                      | B                | 4201 5701         | 2.7                           |  |
| 57C3                     | M   | 48             | 199                       | 790                      | B                | 50 57             | 2.1                           |  |
| 57C4                     | M   | 39             | 186                       | 957                      | B                | 27 57             | 3.5                           |  |
| 57C5                     | F   | 47             | 12                        | 311                      | B                | 57 57             | 3.1                           |  |
| 57C6                     | F   | 29             | 6                         | 760                      | AG               | 51 57             | 3.0                           |  |
| 57C7                     | F   | 43             | 8                         | 810                      | B                | 35 57             | 4.3                           |  |
| 57C8                     | F   | 41             | 72                        | 348                      | B                | 57 57             | 5.0                           |  |
| 57C9                     | F   | 39             | 19                        | 642                      | B                | 53 57             | 5.1                           |  |
| 57C10                    | F   | 42             | 117                       | 458                      | AG               | 63 57             | 1.7                           |  |
| 57C11                    | M   | 50             | 227                       | 412                      | B                | 7 57              | 4.9                           |  |
| 57C12                    | M   | 48             | 371                       | 648                      | B                | 62 5701           | 2.9                           |  |
| 57C13                    | M   | 47             | 460                       | 302                      | B                | NA 5701           | 3.2                           |  |
| <b>B27+ / Viremic</b>    |     |                |                           |                          |                  |                   |                               |  |
| 27NC1                    | M   | 50             | 99350                     | 532                      | D                | 27 27             | 1.4                           |  |
| 27NC2                    | M   | 49             | 35700                     | 142                      | AG               | 13 27             | 1.5                           |  |
| 27NC3                    | M   | 35             | 7586                      | 393                      | B                | 27 35             | 2.8                           |  |
| 27NC4                    | M   | 30             | 5697                      | 861                      | B                | 27 51             | 1.3                           |  |
| 27NC5                    | M   | 53             | 104500                    | 283                      | B                | 27 NA             | 2.9                           |  |

|                          |   |    |        |      |    |      |      |     |
|--------------------------|---|----|--------|------|----|------|------|-----|
| 27NC6                    | M | 49 | 677757 | 9    | AE | 08   | 27   | 1.5 |
| 27NC7                    | F | 42 | 412093 | 48   | B  | 27   | 40   | 1.8 |
| 27NC8                    | M | 44 | 101082 | 845  | AG | 2703 | 5101 | 1.8 |
| 27NC9                    | M | 62 | 749    | 521  | B  | 07   | 27   | 2.6 |
| <b>B27+ / Controller</b> |   |    |        |      |    |      |      |     |
| 27C1                     | F | 43 | 4      | 1534 | B  | 13   | 27   | 3.5 |
| 27C2                     | M | 51 | 6      | 634  | B  | 27   | 60   | 3.5 |
| 27C3                     | M | 57 | 275    | 547  | B  | 14   | 27   | 3.1 |
| 27C4                     | M | 40 | 29     | 774  | B  | 27   | 61   | 5.9 |
| 27C5                     | M | 47 | 402    | 470  | B  | 27   | 40   | 2.3 |

---

\*NA = not available

Table S2. Amino acid sequence of CA

| Patient                  | Viral Subtype | Amino Acid in Gag |     |     |     |     |     |     |     |     |     |     |     |     |     |     |
|--------------------------|---------------|-------------------|-----|-----|-----|-----|-----|-----|-----|-----|-----|-----|-----|-----|-----|-----|
|                          |               | 133               | 134 | 135 | 136 | 137 | 138 | 139 | 140 | 141 | 142 | 143 | 144 | 145 | 146 | 147 |
| <b>B57-</b>              |               |                   |     |     |     |     |     |     |     |     |     |     |     |     |     |     |
| T1                       | AG            | P                 | I   | V   | Q   | N   | A   | Q   | G   | Q   | M   | V   | H   | Q   | S   | I   |
| T2                       | A             | P                 | I   | V   | Q   | N   | A   | Q   | G   | Q   | M   | V   | H   | Q   | S   | L   |
| T3                       | AG            | P                 | V   | V   | Q   | N   | A   | Q   | G   | Q   | M   | V   | H   | Q   | S   | I   |
| T4                       | B             | P                 | I   | V   | Q   | N   | L   | Q   | G   | Q   | M   | V   | H   | Q   | A   | I   |
| T5                       | A1            | P                 | I   | V   | Q   | N   | A   | Q   | G   | Q   | M   | V   | H   | Q   | A   | M   |
| T6                       | B             | P                 | I   | V   | Q   | N   | L   | Q   | G   | Q   | M   | V   | H   | Q   | A   | I   |
| T7                       | AG            | P                 | I   | V   | Q   | N   | A   | Q   | G   | Q   | M   | T   | Y   | Q   | S   | M   |
| T8                       | AG            | P                 | I   | V   | Q   | N   | A   | Q   | G   | Q   | M   | I   | H   | Q   | A   | M   |
| T9                       | B             | P                 | I   | V   | Q   | N   | L   | Q   | G   | Q   | M   | V   | H   | Q   | A   | L   |
| T10                      | A1            | P                 | I   | V   | Q   | N   | A   | Q   | G   | Q   | M   | V   | H   | Q   | S   | L   |
| T11                      | AG            | P                 | I   | V   | Q   | N   | A   | Q   | G   | Q   | M   | I   | H   | Q   | S   | M   |
| T12                      | AG            | P                 | I   | V   | Q   | N   | A   | Q   | G   | Q   | W   | T   | H   | Q   | S   | I   |
| T13                      | AG            | P                 | V   | L   | Q   | N   | A   | Q   | G   | Q   | M   | T   | Y   | Q   | S   | M   |
| T14                      | B             | P                 | I   | V   | Q   | N   | L   | Q   | G   | Q   | M   | V   | H   | Q   | A   | I   |
| T15                      | AG            | P                 | I   | V   | Q   | N   | A   | Q   | G   | Q   | M   | V   | H   | Q   | S   | M   |
| T16                      | AG            | P                 | I   | L   | Q   | N   | A   | Q   | G   | Q   | M   | A   | Y   | Q   | S   | M   |
| <b>B57+ / VIREMIC</b>    |               |                   |     |     |     |     |     |     |     |     |     |     |     |     |     |     |
| 57NC1                    | AG            | P                 | I   | V   | Q   | N   | A   | Q   | G   | Q   | M   | I   | H   | Q   | P   | L   |
| 57NC2                    | B             | P                 | I   | V   | Q   | N   | A   | Q   | G   | Q   | M   | I   | H   | Q   | P   | I   |
| 57NC3                    | AG            | P                 | I   | V   | Q   | N   | A   | Q   | G   | Q   | M   | T   | Y   | Q   | S   | M   |
| 57NC4                    | B             | P                 | I   | V   | Q   | N   | L   | Q   | G   | Q   | M   | V   | H   | Q   | P   | I   |
| 57NC5                    | AG            | P                 | I   | V   | Q   | N   | A   | Q   | G   | Q   | M   | V   | H   | Q   | P   | M   |
| 57NC6                    | B             | P                 | I   | V   | Q   | N   | M   | Q   | G   | Q   | M   | V   | H   | Q   | A   | I   |
| 57NC7                    | B             | P                 | I   | V   | Q   | N   | L   | Q   | G   | Q   | M   | V   | H   | Q   | A   | L   |
| 57NC8                    | AE            | P                 | I   | V   | Q   | N   | A   | Q   | G   | Q   | M   | V   | H   | Q   | P   | L   |
| 57NC9                    | AG            | P                 | V   | V   | Q   | N   | A   | Q   | G   | Q   | W   | T   | H   | Q   | P   | I   |
| 57NC10                   | B             | P                 | I   | V   | Q   | N   | M   | Q   | G   | Q   | M   | V   | H   | Q   | A   | L   |
| 57NC11                   | B             | P                 | I   | V   | R   | N   | L   | Q   | G   | Q   | M   | V   | H   | Q   | P   | L   |
| 57NC12                   | B             | P                 | I   | V   | Q   | N   | L   | Q   | G   | Q   | M   | V   | H   | Q   | P   | I   |
| 57NC13                   | B             | P                 | I   | V   | Q   | N   | L   | Q   | G   | Q   | M   | V   | H   | Q   | P   | L   |
| <b>B57+ / CONTROLLER</b> |               |                   |     |     |     |     |     |     |     |     |     |     |     |     |     |     |
| 57C1                     | B             | P                 | I   | V   | Q   | N   | L   | Q   | G   | Q   | M   | V   | H   | Q   | A   | L   |
| 57C2                     | B             | P                 | I   | V   | Q   | N   | M   | Q   | G   | Q   | M   | V   | H   | Q   | P   | L   |
| 57C3                     | B             | P                 | I   | V   | Q   | N   | L   | Q   | G   | Q   | M   | V   | H   | Q   | S   | L   |
| 57C4                     | B             | P                 | I   | V   | Q   | N   | L   | Q   | G   | Q   | M   | V   | H   | Q   | P   | I   |
| 57C5                     | B             | P                 | I   | V   | Q   | N   | M   | Q   | G   | Q   | M   | V   | H   | Q   | A   | L   |
| 57C6                     | AG            | P                 | I   | L   | Q   | N   | A   | Q   | G   | Q   | M   | A   | Y   | Q   | S   | M   |
| 57C7                     | B             | P                 | I   | V   | Q   | N   | I   | Q   | G   | Q   | M   | V   | H   | Q   | P   | I   |
| 57C8                     | B             | P                 | I   | V   | Q   | N   | I   | Q   | G   | Q   | M   | V   | H   | Q   | P   | I   |
| 57C9                     | B             | P                 | I   | V   | Q   | N   | L   | Q   | G   | Q   | M   | V   | H   | Q   | S   | L   |
| 57C10                    | AG            | P                 | I   | V   | Q   | N   | A   | Q   | G   | Q   | M   | V   | H   | Q   | P   | M   |
| 57C11                    | B             | P                 | I   | V   | Q   | N   | I   | Q   | G   | Q   | M   | V   | H   | Q   | P   | L   |
| 57C12                    | B             | P                 | I   | V   | Q   | N   | L   | Q   | G   | Q   | M   | V   | H   | Q   | P   | I   |
| 57C13                    | B             | P                 | I   | V   | Q   | N   | L   | Q   | G   | Q   | M   | V   | H   | Q   | A   | L   |

| Patient                  | Viral Subtype | Amino Acid in Gag |     |     |     |     |     |     |     |     |     |     |     |     |     |     |
|--------------------------|---------------|-------------------|-----|-----|-----|-----|-----|-----|-----|-----|-----|-----|-----|-----|-----|-----|
|                          |               | 133               | 134 | 135 | 136 | 137 | 138 | 139 | 140 | 141 | 142 | 143 | 144 | 145 | 146 | 147 |
| <b>B27+ / VIREMIC</b>    |               |                   |     |     |     |     |     |     |     |     |     |     |     |     |     |     |
| 27NC1                    | D             | P                 | I   | V   | Q   | N   | L   | Q   | G   | Q   | M   | V   | H   | Q   | A   | L   |
| 27NC2                    | AG            | P                 | I   | V   | Q   | N   | T   | H   | G   | Q   | M   | V   | H   | Q   | P   | M   |
| 27NC3                    | B             | P                 | I   | V   | Q   | N   | M   | Q   | G   | Q   | M   | V   | H   | Q   | A   | I   |
| 27NC4                    | B             | P                 | I   | V   | Q   | N   | L   | Q   | G   | Q   | M   | V   | H   | Q   | A   | I   |
| 27NC5                    | B             | P                 | I   | V   | Q   | N   | L   | Q   | G   | Q   | M   | V   | H   | Q   | A   | I   |
| 27NC6                    | AE            | P                 | I   | V   | Q   | N   | A   | Q   | G   | Q   | M   | V   | H   | Q   | P   | I   |
| 27NC7                    | B             | P                 | I   | V   | Q   | N   | M   | Q   | G   | Q   | M   | V   | H   | Q   | A   | I   |
| 27NC8                    | AG            | P                 | I   | V   | Q   | N   | A   | Q   | G   | Q   | M   | T   | H   | Q   | S   | M   |
| 27NC9                    | B             | P                 | I   | V   | Q   | N   | M   | Q   | G   | Q   | M   | V   | H   | Q   | A   | L   |
| <b>B27+ / CONTROLLER</b> |               |                   |     |     |     |     |     |     |     |     |     |     |     |     |     |     |
| 27C1                     | B             | P                 | I   | V   | Q   | N   | I   | Q   | G   | Q   | M   | V   | H   | Q   | A   | L   |
| 27C2                     | B             | P                 | I   | V   | Q   | N   | I   | Q   | G   | Q   | M   | V   | H   | Q   | A   | I   |
| 27C3                     | B             | P                 | I   | V   | Q   | N   | L   | Q   | G   | Q   | M   | V   | H   | Q   | A   | I   |
| 27C4                     | B             | P                 | I   | V   | Q   | N   | L   | Q   | G   | Q   | M   | V   | H   | Q   | A   | I   |
| 27C5                     | B             | P                 | I   | V   | Q   | N   | L   | Q   | G   | Q   | M   | V   | H   | Q   | A   | I   |

148 149 150 151 152 153 154 155 156 157 158 159 160 161 162 163 164 165 166

S P R T L N A W V K A I E E K A F S P  
S P R T L N A W V K V I E E K A F S P  
S P R T L N A W V K A I E E K A F S P  
S P R T L N A W V K V V E E K A F S P  
S P R T L N A W V K V I E E K A F S P  
S P R T L N A W V K V V E E K A F S P  
S P R T L N A W V K V I E E K S F S P  
S P R T L N A W V K V I E E K G F S P  
S P R T L N A W V K A V E E K A F S P  
S P R T L N A W V K A I E E K A F S P  
S P R T L N A W V K A I E E K A F S P  
S P R T L N A W V K V I E E K A F S P  
S P R T L N A W V K V V E E K A F S P  
S P R T L N A W V K V I E E K A F S P  
S P R T L N A W V K V I E E K A F S P

S P R T L N A W V K V I E E K N F S P  
S P R T L N A W V K V I E E K A F S P  
S P R T L N A W V K V I E E K A F S P  
S P R T L N A W V K V V E E K A F S P  
S P R T L N A W V K V I E D K G F S P  
S P R T L N A W V K V I E E K A F S P  
S P R T L N A W V K V I E E K A F S P  
S P R T L N A W V K V V E E K G F N P  
S P R T L N A W V K V I E E K A F S P  
S P R T L N A W V K V I E E K A F S P  
S P R T L N A W V K V V E E K A F S P  
S P R T L N A W V K V V E E K A F S P

S P R T L N A W V K V I E E K A F S P  
S P R T L N A W V K V V E E K S F S P  
S P R T L N A W V K V V E E K A F S P  
S P R T L N A W V K V V E E K A F S P  
S P R T L N A W V K V I E E K A F S P  
S P R T L N A W V K V I E E K A F S P  
S P R T L N A W V K V V E E K A F S P  
S P R T L N A W V K V I E D K A F S P  
S P R T L N A W V K V I E E K A F S P  
S P R T L N A W V K V V E E K A F S P  
T P R T L N A W V K V V E E K A F S P  
S P R T L N A W V K V V E E K A F S P

148 149 150 151 152 153 154 155 156 157 158 159 160 161 162 163 164 165 166

S P R T L N A W V K V I E E K A F S P  
S P R T L N A W V K V I E E K A F S P  
S P R T L N A W V K V I E E K A F S P  
S P R T L N A W V K V I E E K A F S P  
S P R T L N A W V K V V E E K A F S P  
S P R T L N A W V K V V E E K G F N P  
S P R T L N A W V K V I E E K A F N P  
S P R T L N A W V K V I E E K A F S P  
S P R T L N A W V K V V E E K A F S P

S P R T L N A W V K V V E E K A F S P  
S P R T L N A W V K V V E E K A F S P  
S P R T L N A W V K V V E E K A F S P  
S P R T L N A W V K V V E E K A F S P  
S P R T L N A W V K V I E E K A F S P



167 168 169 170 171 172 173 174 175 176 177 178 179 180 181 182 183 184 185

E V I P M F T A L S E G A T P Q D L N  
E V I P M F S A L S E G A T P Q D L N  
E V I P M F T A L S E G A T P Q D L N  
E V I P M F S A L S E G A T P Q D L N  
E V I P M F S A L A E G A T P Q D L N  
E V I P M F T A L S E G A P P Q D L N  
E I I P M F T A L S E G A T P Q D L N  
E V I P M F T A L S E G A T P Q D L N  
E V I P M F T A L S E G A T P Q D L N  
E V I P M F T A L S E G A T P Q D L N  
E V I P M F S A L A E G A T P Q D L N  
E V I P M F S A L S E G A T P Q D L N  
E V I P M F T A L S E G A T P Q D L N  
E V I P M F T A L S E G A T P Q D L N

E V I P M F S A L S E G A T P Q D L N  
E V I P M F S A L S E G A T P Q D L N  
E V I P M F S A L S E G C T P Q D L N  
E V I P M F S A L S E G A T P Q D L N  
E V I P M F S A L S E G A T P Q D L N  
E V I P M F S A L S E G A T P Q D L N  
E V I P M F S A L S E G A T P Q D L N  
E V I P M F T A L S E G A T P Q D L N  
E V I P M F S A L S E G A T P Q D L N  
E V I P M F S A L S E G A T P Q D L N  
E V I P M F T A L S E G A T P Q D L N

E V I P M F A A L S E G A T P Q D L N  
E V I P M F T A L S E G A T P Q D L N  
E V I P M F S A L S E G A T P Q D L N  
E V I P M F V A L S E G A T P Q D L N  
E V I P M F T A L S E G A T P Q D L N  
E V I P M F S A L S E G A T P Q D L N  
E V I P M F T A L S E G A T P Q D L N  
E V I P M F S A L S E G A T P Q D L N  
E V I P M F S A L S E G A T P Q D L N  
E V I P M F T A L S E G A T P Q D L N  
E V I P M F T A L S E G A T P Q D L N

167 168 169 170 171 172 173 174 175 176 177 178 179 180 181 182 183 184 185

E V I P M F T A L S E G A T P Q D L N  
E V I P M F T A L S E G A T P Q D L N  
E V I P M F S A L S E G A T P Q D L N  
E V I P M F A A L S E G A T P Q D L N  
E V I P M F S A L S E G A T P Q D L N  
E V I P M F S A L S E G A T P Q D L N  
E I I P M F A A L S E G A T P Q D L N  
E V I P M F S A L S E G A T P Q D L N  
E V I P M F T A L S E G A T P Q D L N

E V I P M F S A L S E G A T P Q D L N  
E V I P M F S A L S E G A T P Q D L N  
E V I P M F S A L S E G A T P Q D L N  
E V I P M F S A L S E G A T P Q D L N  
E V I P M F S A L S E G A T P Q D L N

| 186 | 187 | 188 | 189 | 190 | 191 | 192 | 193 | 194 | 195 | 196 | 197 | 198 | 199 | 200 | 201 | 202 | 203 | 204 |
|-----|-----|-----|-----|-----|-----|-----|-----|-----|-----|-----|-----|-----|-----|-----|-----|-----|-----|-----|
| M   | M   | L   | N   | I   | V   | G   | G   | H   | Q   | A   | A   | M   | Q   | M   | L   | K   | D   | T   |
| M   | M   | L   | N   | I   | V   | G   | G   | H   | Q   | A   | A   | M   | Q   | M   | L   | K   | D   | T   |
| M   | M   | L   | N   | I   | V   | G   | G   | H   | Q   | A   | A   | M   | Q   | M   | L   | K   | D   | T   |
| T   | M   | L   | N   | T   | V   | G   | G   | H   | Q   | A   | A   | M   | Q   | M   | L   | K   | E   | T   |
| M   | M   | L   | N   | I   | V   | G   | G   | H   | Q   | A   | A   | M   | Q   | M   | L   | K   | D   | T   |
| T   | M   | L   | N   | T   | V   | G   | G   | H   | Q   | A   | A   | M   | Q   | M   | L   | K   | E   | T   |
| M   | M   | L   | N   | I   | V   | G   | G   | H   | Q   | A   | A   | M   | Q   | M   | L   | K   | D   | T   |
| M   | M   | L   | N   | I   | V   | G   | G   | H   | Q   | A   | A   | M   | Q   | M   | L   | K   | D   | T   |
| T   | M   | L   | N   | T   | V   | G   | G   | H   | Q   | A   | A   | M   | Q   | M   | L   | K   | D   | T   |
| S   | M   | L   | N   | I   | V   | G   | G   | H   | Q   | A   | A   | M   | Q   | M   | L   | K   | D   | T   |
| M   | M   | L   | N   | I   | V   | G   | G   | H   | Q   | A   | A   | M   | Q   | M   | L   | K   | D   | T   |
| M   | M   | L   | N   | I   | V   | G   | G   | H   | Q   | A   | A   | M   | Q   | M   | L   | K   | D   | T   |
| T   | M   | L   | N   | T   | V   | G   | G   | H   | Q   | A   | A   | M   | Q   | M   | L   | K   | E   | T   |
| M   | M   | L   | N   | I   | V   | G   | G   | H   | Q   | A   | A   | M   | Q   | M   | L   | K   | D   | T   |
| M   | M   | L   | N   | I   | I   | G   | G   | H   | Q   | A   | A   | M   | Q   | M   | L   | K   | D   | T   |
|     |     |     |     |     |     |     |     |     |     |     |     |     |     |     |     |     |     |     |
| M   | M   | L   | N   | I   | V   | G   | G   | H   | Q   | A   | A   | M   | Q   | M   | L   | K   | D   | T   |
| T   | M   | L   | N   | T   | V   | G   | G   | H   | Q   | A   | A   | M   | Q   | M   | L   | K   | E   | T   |
| M   | M   | L   | N   | I   | V   | G   | G   | H   | Q   | A   | A   | M   | Q   | M   | L   | K   | D   | T   |
| T   | M   | L   | N   | T   | V   | G   | G   | H   | Q   | A   | A   | M   | Q   | M   | L   | K   | E   | T   |
| M   | M   | L   | N   | I   | V   | G   | G   | H   | Q   | A   | A   | M   | Q   | M   | L   | K   | D   | T   |
| M   | M   | L   | N   | I   | V   | G   | G   | H   | Q   | A   | A   | M   | Q   | M   | L   | K   | D   | T   |
| T   | M   | L   | N   | T   | V   | G   | G   | H   | Q   | A   | A   | M   | Q   | M   | L   | K   | E   | T   |
| T   | M   | L   | N   | T   | V   | G   | G   | H   | Q   | A   | A   | M   | Q   | M   | L   | K   | E   | T   |
| T   | M   | L   | N   | T   | I   | G   | G   | H   | Q   | A   | A   | M   | Q   | M   | L   | K   | E   | T   |
|     |     |     |     |     |     |     |     |     |     |     |     |     |     |     |     |     |     |     |
| T   | M   | L   | N   | T   | V   | G   | G   | H   | Q   | A   | A   | M   | Q   | M   | L   | K   | E   | T   |
| T   | M   | L   | N   | T   | V   | G   | G   | H   | Q   | A   | A   | M   | Q   | M   | L   | K   | E   | T   |
| T   | M   | L   | N   | T   | V   | G   | G   | H   | Q   | A   | A   | M   | Q   | M   | L   | K   | D   | T   |
| T   | M   | L   | N   | T   | V   | G   | G   | H   | Q   | A   | A   | M   | Q   | M   | L   | K   | E   | T   |
| M   | M   | L   | N   | I   | V   | G   | G   | H   | Q   | A   | A   | M   | Q   | I   | L   | K   | D   | T   |
| T   | M   | L   | N   | T   | V   | G   | G   | H   | Q   | A   | A   | M   | Q   | M   | L   | K   | E   | T   |
| T   | M   | L   | N   | T   | V   | G   | G   | H   | Q   | A   | A   | M   | Q   | M   | L   | K   | E   | T   |
| T   | M   | L   | N   | T   | V   | G   | G   | H   | Q   | A   | A   | M   | Q   | M   | L   | K   | E   | T   |
| M   | M   | L   | N   | I   | V   | G   | G   | H   | Q   | A   | A   | M   | Q   | M   | L   | K   | D   | T   |
| T   | M   | L   | N   | T   | V   | G   | G   | H   | Q   | A   | A   | M   | Q   | M   | L   | K   | E   | T   |
| T   | M   | L   | N   | T   | V   | G   | G   | H   | Q   | A   | A   | M   | Q   | M   | L   | K   | E   | T   |
| T   | M   | L   | N   | T   | V   | G   | G   | H   | Q   | A   | A   | M   | Q   | M   | L   | K   | D   | T   |

| 186 | 187 | 188 | 189 | 190 | 191 | 192 | 193 | 194 | 195 | 196 | 197 | 198 | 199 | 200 | 201 | 202 | 203 | 204 |
|-----|-----|-----|-----|-----|-----|-----|-----|-----|-----|-----|-----|-----|-----|-----|-----|-----|-----|-----|
| T   | M   | L   | N   | T   | V   | G   | G   | H   | Q   | A   | A   | M   | Q   | M   | L   | K   | E   | T   |
| M   | M   | L   | N   | I   | V   | G   | G   | H   | Q   | A   | A   | M   | Q   | M   | L   | K   | D   | T   |
| T   | M   | L   | N   | T   | V   | G   | G   | H   | Q   | A   | A   | M   | Q   | M   | L   | K   | E   | T   |
| T   | M   | L   | N   | T   | V   | G   | G   | H   | Q   | A   | A   | M   | Q   | M   | L   | K   | E   | T   |
| T   | M   | L   | N   | T   | V   | G   | G   | H   | Q   | A   | A   | M   | Q   | M   | L   | K   | E   | T   |
| M   | M   | L   | N   | I   | V   | G   | G   | H   | Q   | A   | A   | M   | Q   | M   | L   | K   | E   | T   |
| T   | M   | L   | N   | T   | V   | G   | G   | H   | Q   | A   | A   | M   | Q   | M   | L   | K   | E   | T   |
| M   | M   | L   | N   | I   | V   | G   | G   | H   | Q   | A   | A   | M   | Q   | M   | L   | K   | D   | T   |
| T   | M   | L   | N   | T   | V   | G   | G   | H   | Q   | A   | A   | M   | Q   | M   | L   | K   | E   | T   |
|     |     |     |     |     |     |     |     |     |     |     |     |     |     |     |     |     |     |     |
| T   | M   | L   | N   | T   | V   | G   | G   | H   | Q   | A   | A   | M   | Q   | M   | L   | K   | E   | T   |
| T   | M   | L   | N   | T   | V   | G   | G   | H   | Q   | A   | A   | M   | Q   | M   | L   | K   | E   | T   |
| T   | M   | L   | N   | T   | V   | G   | G   | H   | Q   | A   | A   | M   | Q   | M   | L   | K   | E   | T   |
| T   | M   | L   | N   | T   | V   | G   | G   | H   | Q   | A   | A   | M   | Q   | M   | L   | K   | E   | T   |

205 206 207 208 209 210 211 212 213 214 215 216 217 218 219 220 221 222 223

I N D E A A E W D R T H P V H A G P I  
I N E E A A E W D R V H P V H A G P I  
I N E E A V E W D R A H P V H A G P A  
I N E E A A E W D R L H P V H A G P V  
I N E E A A E W D R L H P P Q A G P F  
I N E E A A E W D R V H P V H A G P I  
I N D E A A E W D R L H P V H A G P F  
I N D E A A D W D R V H P V H A G P I  
I N E E A A E W D R L H P V H A G P V  
I N E E A A E W D R I H P V Q A G P I  
I N D E A A E W D R T H P V H A G P I  
I N E E A A E W D R T H P V H A G P I  
I N E E A A E W D R I H P V H A G P N  
I N E E A A E W D R L H P V H A G P I  
I N E E A A E W D R I H P V H A G P I  
I N E E A A E W D R V H P V H A G P H

I N E E A A E W D R V H P V H A G P I  
I N E E A A E W D R V H P V H A G P V  
I N E E A A E W D R V H P V H A G P I  
I N E E A A E W D R L H P P Q A G P I  
I N E E A A E W D R V H P V H A G P I  
I N E E A A E W D R L H P V H A G P I  
I N E E A A E W D R L H P P H A G P I  
I N E E A A E W D R V H P V H A G P I  
I N E E A A E W D R T H P V H A G P I  
I N E E A A E W D R L H P P Q A G P V  
I N E E A A E W D R L H P V H A G P I  
I N E E A A E W D R L H P V H A G P I  
I N E E A A E W D R L H P V Q A G P V

I N E E A A E W D R L H P V H A G P V  
I N E E A A E W D R L H P V H A G P I  
I N E E A A E W D R L H P V H A G P I  
I N E E A A E W D R L H P V H A G P V  
I N E E A A E W D R L H P V H A G P V  
I N E E A A E W D R I H P V H A G P N  
I N E E A A E W D R L H P V H A G P I  
I N E E A A E W D R L H P V H A G P V  
I N E E A A E W D R L H P V H A G P I  
I N E E A A E W D R T H P V H A G P I  
I N E E A A E W D R L H P V H A G P I  
I N E E A A E W D R L H P V H A G P I  
I N E E A A E W D R L H P V H A G P I

205 206 207 208 209 210 211 212 213 214 215 216 217 218 219 220 221 222 223

I N E E A A E W D R L H P V H A G P V  
I N E E A A E W D R V H P V H A G P N  
I N E E A A E W D R L H P V Q A G P V  
I N E E A A E W D R L H P V H A G P V  
I N E E A A E W D R L H P V H A G P I  
I N E E A A E W D R V H P V H A G P I  
I N E E A A E W D R L H P A Q A G P V  
I N E E A A E W D R V H P V Q A G P I  
I N E E A A E W D R L H P V H A G P I

I N E E A A E W D R L H P V H A G P V  
I N E E A A E W D R L H P V H A G P I  
I N E E A A E W D R L H P V H A G P I  
I N E E A A E W D R L H P V H A G P I  
I N D E A A E W D R L H P V P A G P I

224 225 226 227 228 229 230 231 232 233 234 235 236 237 238 239 240 241 242

P P G Q M R E P R G S D I A G T T S T  
P P G Q M R E P R G S D I A G T T S N  
P P G Q M R E P R G S D I A G T T S T  
A P G Q M R E P R G S D I A G T T S N  
P P G Q L R E P R G S D I A G T T S S  
A P G Q M R E P R G S D I A G T T S T  
Q P G Q M R E P R G S D I A G T T S T  
P P G Q M R E P R G S D I A G T T S T  
A P G Q M R E P R G S D I A G T T S T  
P P G Q M R E P R G S D I A G T T S T  
P P G Q M R E P R G S D I A G T T S T  
P P G Q M R E P R G S D I A G T T S T  
P A G Q M R E P R G S D I A G T T S T  
A P G Q I R E P R G S D I A G T T S T  
A P G Q M R E P R G S D I A G T T S T  
P A G Q M R E P R G S D I A G T T S T

P P G Q M R E P R G S D I A G T T S N  
A P G Q M R E P R G S D I A G T T S N  
P P G Q M R E P R G S D I A G T T S T  
A P G Q I R E P R G S D I A G T T S N  
P P G Q M R E P R G S D I A G T T S N  
A P G Q M R E P R G S D I A G T T S N  
P P G Q I R E P R G S D I A G T T S N  
P P G Q M R E P R G S D I A G T T S T  
A P G Q M R E P R G S D I A G T T S N  
A P G Q M R E P R G S D I A G T T S N  
A P G Q M R E P R G S D I A G T T S T  
A P G Q I R E P R G S D I A G T T S N

A P G Q M R E P R G S D I A G T T S N  
A P G Q M R E P R G S D I A G T T S N  
A P G Q M R E P R G S D I A G T T S T  
A P G Q M R E P R G S D I A G T T S N  
A P G Q M R E P R G S D I A G T T S N  
P P G Q M R E P R G S D I A G T T S N  
A P G Q M R E P R G S D I A G T T S N  
A P G Q I R E P R G S D I A G T T S N  
A P G Q M R E P R G S D I A G T T S N  
A P G Q M R E P R G S D I A G T T S N  
A P G Q M R E P R G S D I A G T T S N  
A P G Q L R E P R G S D I A G T T S N

224 225 226 227 228 229 230 231 232 233 234 235 236 237 238 239 240 241 242

A P G Q M R E P R G S D I A G V T S T  
P P G Q I R E P R G S D I A G V T S T  
A P G Q M R E P R G S D I A G T T S T  
A P G Q M R E P R G S D I A G T T S T  
A P G Q M R E P R G S D I A G T T S T  
P P G Q M R E P R G S D I A G V T S T  
A P G Q M R D P R G S D I A G T T S T  
A P G Q M R E P R G S D I A G T T S T  
A P G Q M R E P R G S D I A G T T S T

A P G Q M R E P R G S D I A G T T S S  
A P G Q M R E P R G S D I A G T T S T  
A P G Q M R E P R G S D I A G T T S T  
A P G Q M R E P R G S D I A G T T S T  
A P G Q M R D P R G S D I A G S T S T



243 244 245 246 247 248 249 250 251 252 253 254 255 256 257 258 259 260 261

L Q E Q I G W M T S N P P I P V G E I  
L Q E Q I G W M T G N P P V P V G E I  
L Q E Q I G W M T S N N P P I P V G E I  
L Q E Q I G W M T N N P P I P V G E I  
L Q E Q I G W M T S N P P I P V G E I  
L Q E Q I G W M T N N P P I P V G E I  
L Q E Q I G W M T S N P P I P V G E I  
V Q E Q I A W M T S N P P V P V G E I  
L Q E Q V G W M T S N P P I P V G E I  
L Q E Q I A W M T S N P P I P V G E I  
L Q E Q I G W M T S N P P I P V G E I  
L Q E Q I G W M T S N P P V P V G E I  
L Q E Q I G W M T S N P P I P V G E I  
L Q E Q I G W M T H N P P I P V G E I  
L Q E Q I G W M T S N P P I P V G E I  
L Q E Q I G W M T G N P S I P V G E I

L Q E Q I G W M T S N P P I P V G E I  
L Q E Q I A W M T N N P P I P V G E I  
P Q E Q I G W M T S N P P T P V G E I  
L Q E Q I T W M T N N P P I P V G E I  
L Q E Q I G W M T S N P P T P V G E I  
L Q E Q I A W M T N N P P I P V G E I  
L Q E Q I G W M T S N P P I P V G E I  
L Q E Q I A W M T N N P P I P V G D I  
P Q E Q I G W M T G N P P I P V G E I  
L Q E Q I G W M T S N P P I P V G E I  
L Q E Q I A W M T N N P P I P V G E I  
L Q E Q I G W M T N N P P I P V G E I  
L Q E Q I A W M T H N P P I P V G E I

L Q E Q I G W M T N N P P I P V G E I  
L Q E Q I G W M T H N P P I P V G E I  
L R E Q I D W M T S N P P I P V G E I  
L Q E Q I G W M T N N P P I P V G E I  
L Q E Q I E W M T S N P P T P V G E I  
L Q E Q I G W M T N N P P I P V G E I  
L Q E Q I G W M T N N P P I P V G E I  
L Q E Q I G W M T N N P P I P V G E I  
L Q E Q I T W M T S N P P I P V G E I  
L Q E Q I A W M T G N P P I P V G D L  
L Q E Q I G W M T N N P P I P V G E I  
L Q E Q I G W M T S N P P I P V G E I  
L Q E Q I A W M T H N P P I P V G E I

243 244 245 246 247 248 249 250 251 252 253 254 255 256 257 258 259 260 261

L Q E Q I G W M T S N P P I P V G E I  
L Q E Q I A W M T S N P P I P V G E I  
L Q E Q I G W M T H N P P I P V G E I  
L Q E Q I G W M T S N P P T P V G E I  
L Q E Q I G W M T N N P P I P V G E I  
L Q E Q I G W M T S N P P I P V G D V  
L Q E Q I G W M T S N P P I P V G E I  
L Q E Q I G W M T S N P P I P V G E I  
L Q E Q I G W M T H N P P I P V G E I

L Q E Q I G W M T N N P P I P V G E I  
L Q E Q I G W M T N N P P I P V G E I  
L Q E Q I G W M T N N P P I P V G E I  
L Q E Q I G W M T N N P P I P V G E I  
L Q E Q I G W M T G N P A I P V G E I

262 263 264 265 266 267 268 269 270 271 272 273 274 275 276 277 278 279 280

Y K R W I V L G L N K I V R M Y S P V  
Y R R W I I L G L N K I V R M Y S P V  
Y K R W I V L G L N K I V R M Y S P V  
Y K R W I I L G L N K I V R M Y S P T  
Y R R W I I L G L N K I V R M Y S P V  
Y K R W I I L G L N K I V R M Y S P V  
Y K R W I V L G L N K I V R M Y S P T  
Y K R W I V L G L N K I V R M Y S P V  
Y K R W I I L G L N K I V R M Y S P V  
Y K R W I V L G L N K I V R M Y S P V  
Y K R W I V L G L N K I V R M Y S P V  
Y K R W I I L G L N K I V R M Y S P V  
Y K R W I I L G L N K I V R M Y S P V  
Y K R W I V L G L N K I V R M Y S P V  
Y K R W I I L G L N K I V R M Y S P A  
Y K R W I I M G L N K I V R M Y S P T  
Y K R W I V L G L N K I V R M Y S P V  
Y K R W I V L G L N K I V R M Y S P V

Y R R W I I L G L N K I V R M Y S P V  
Y K R W I I L G L N K I V R M Y S P V  
Y R R W I I L G L N K I V R M Y S P T  
Y K R W I I M G L N K I V R M Y S P T  
Y R R W L I L G L H K I V K M Y S P V  
Y K R W I I L G L N K I V R M Y S P I  
Y K R W I I L G L N K I V R M Y S P V  
Y K R W I I L G L N K I V R M Y S P V  
Y K R W I I L G L N K I V R M Y S P V  
Y K R W I I L G L N K I V R M Y S P V  
Y K R W I I L G L N K I V R M Y S P V  
Y K R W I I L G L N K I V R M Y S P T  
Y K R W I I L G L N K I V R M Y S P T

Y K K W I I M G L N K I V R M Y S P V  
Y K R W I V L G L N K I V R M Y S P S  
Y K R W I I L G L N K I V R M Y S P V  
Y K R W I I L G L N K I V R M Y S P T  
Y K R W I I L G L N K I V R M Y S P V  
Y K K W I V L G L H K I V R M Y S P T  
Y K R W I I L G L N K I V R M Y S P T  
Y K R W I I L G L N K I V R M Y S P A  
Y K R W I I L G L N K I V R M Y S P V  
Y K R W I I L G L N K I V R M Y S P V  
Y K R W I I L G L N K I V R M Y S P T  
Y K R W I I L G L N K I V R M Y S P T  
Y K R W I I L G L N K I V R M Y S P T

262 263 264 265 266 267 268 269 270 271 272 273 274 275 276 277 278 279 280

Y K K W I V M G L N K I V R M Y S P V  
Y K K W I V L G L N K I V R M Y S P V  
Y K R W I I M G L N K V V K M Y S P V  
Y K R W I I L G L N K I V R M Y S P V  
Y K R W I I L G L N K I V R M Y S P T  
Y K K W I I L G L N K I V R M Y S P V  
Y K K W I I M G L N K I V R M Y S P V  
Y R R W I I M G L N K I V R M Y S P V  
Y K R W I I M G L N K I V K M Y S P I

Y K R W I I M G L N K I V R M Y S P T  
Y K R W I I L G L N K I V R M Y S P S  
Y K R W I I L G L N K I V R M Y S P T  
Y K R W I I M G L N K V V K M Y S P T  
Y K R W I I M G L N K I V R M Y S P V

281 282 283 284 285 286 287 288 289 290 291 292 293 294 295 296 297 298 299

S I L D I R Q G P K E P F R D Y V D R  
G I L D I K Q G P K E P F R D Y V D R  
S I L D I R Q G P K E P F R D Y V D R  
S I L D I R Q G P K E P F R D Y V D R  
S I L D I K Q G P K E P F R D Y V D R  
S I L D I R Q G P K E P F R D Y V D R  
S I L D I R Q G P K E P F R D Y V D R  
S I L D I K Q G P K E P F R D Y V D R  
S I L D I R Q G P K E P F R D Y V D R  
S I L D I R Q G P K E P F R D Y V D R  
S I L D I R Q G P K E P F R D Y V D R  
S I L D I R Q G P K E P F R D Y V D R  
S I L D I K Q G P K E P F R D Y V D R  
S I L D I K Q G P K E P F R D Y V D R

S I L D I R Q G P K E P F R D Y V D R  
S I L D I R Q G P K E P F R D Y V D R  
S I L D I R Q G P K E P F R D Y V D R  
G I L D I K Q G P K E P F R D Y V D R  
S I L D I R Q G P K E P F R D Y V D R  
S I L D I R Q G P K E P F R D Y V D R  
G I L D I R Q G P K E P F R D Y V D R  
S I L D I R Q G P K E P F R D Y V D R  
S I L D I K Q G P K E P F R D Y V D R  
S I L D I R Q G P K E P F R D Y V D R  
S I L D I K Q G P K E P F R D Y V D R

S I L D I R Q G P K E P F R D Y V D R  
S I L D I R Q G P K E P F R D Y V D R  
S I L D I R Q G P K E P F R D Y V D R  
S I L D I R Q G P K E P F R D Y V D R  
S I L D I K Q G P K E P F R D Y V D R  
S I L D I K Q G P K E P F R D Y V D R  
S I L D I R Q G P K E P F R D Y V D R  
S I L D I R Q G P K E P F R D Y V D R  
S I L D I R Q G P K E P F R D Y V D R  
S I L D I R Q G P K E P F R D Y V D R  
S I L D I K Q G P K E P F R D Y V D R

281 282 283 284 285 286 287 288 289 290 291 292 293 294 295 296 297 298 299

N I L D I R Q G P K E P F R D Y V D R  
S I L D I R Q G P K E P F R D Y V D R  
S I L D I R Q G P K E P F R D Y V D R  
S I L D I K Q G P K E P F R D Y V D R  
S I L D I R Q G P K E P F R D Y V D R  
S I L D I R Q G P K E P F R D Y V D R  
S I L D I K Q G P K E P F R D Y V D R  
S I L D I K Q G P K E P F R D Y V D R  
S I L D I K Q G P K E P F R D Y V D R

S I L D I K Q G P K E P F R D Y V D R  
S I L D I R Q G P K E P F R D Y V D R  
S I L D I K Q G P K E P F R D Y V D R  
S I L D I R Q G P K E P F R D Y V D R  
S I L D I R Q G P K E P F R D Y V D R

300 301 302 303 304 305 306 307 308 309 310 311 312 313 314 315 316 317 318

F F K T L R A E Q A T Q E V K G W M T  
F F K C L R A E Q A S Q E V K N W M T  
F F K A L R A E Q A T Q E V K N W M T  
F Y K T L R A E Q A S Q E V K N W M T  
F F K T L R A E Q A T Q E V K N W M T  
F Y K T L R A E Q A S Q D V K N W M T  
F F K T L R A E Q A T Q E V K G W M T  
F F K T L R A E Q G S Q D V K N W M T  
F Y K T L R A E Q A S Q D V K N W M T  
F F K I L R A E Q A T Q A V K N W M T  
F F K T L R A E Q A T Q E V K N W M T  
F F K T L R A E Q A T Q E V K N W M T  
F F K T L R A E Q A T Q E V K N W M T  
F Y K T L R A E Q A S Q E V K N W M T  
F F K T L R A E Q A T Q E V K N W M T  
F F K T L R A E Q S S Q E V K N W M T

F F K C L R A E Q A T Q E V K N W M T  
F Y K T L R A E Q A T Q E V K N W M T  
F F K T L R A E Q C T Q E V K N W M T  
F Y K T L R A E Q A S Q E V K N W M T  
F F K T L R A E Q A T Q D V K N W M T  
F Y K T L R A E Q A S Q E V K N W M T  
F Y K T L R A E Q A T Q E V K N W M T  
F Y K T L R A E Q A S Q E V K N W M T  
F F K T L R A E Q A T Q E V K N W M T  
F Y K T L R A E Q A T Q E V K N W M T  
F Y K T L R A E Q A S Q D V K N W M T  
F Y K T L R A E Q A S Q E V K N W M T  
F Y K T L R A E Q A S Q E V K N W M T

F Y K T L R A E Q A S Q E V K N W M T  
F Y K T L R A E Q A S Q E V K N W M T  
F Y K T L R A E Q A S Q D V K N W M T  
F Y K T L R A E Q A S Q D V K N W M T  
F Y K T L R A E Q A S Q E V K N W M T  
F F K T L R A E Q A T Q E V K N W M T  
F Y K T L R A E Q A S Q E V K N W M T  
F Y K T L R A E Q A S Q E V K N W M T  
F Y K T L R A E Q A S Q E V K N W M T  
F Y K T L R A E Q A S Q E V K N W M T  
F F K A L R A E Q A T Q E V K N W M T  
F Y K T L R A E Q A S Q E V K N W M T  
F Y K T L R A E Q A S Q D V K N W M T

300 301 302 303 304 305 306 307 308 309 310 311 312 313 314 315 316 317 318

F Y K T L R A E Q A S Q D V K N W M T  
F F K T L R A E Q A T Q E V K N W M T  
F Y K T L R A E Q A T Q E V K N W M T  
F Y K T L R A E Q A S Q E V K N W M T  
F Y K T L R A E Q A S Q E V K N W M T  
F Y K T L R A E Q A T Q E V K N W M T  
F Y K T L R A E Q A T Q E V K N W M T  
F F K T L R A E Q A T Q E V K N W M T  
F Y K T L R A E Q A S Q E V K N W M T

F Y K T L R A E Q A S Q D V K N W M T  
F Y K T L R A E Q A S Q E V K N W M T  
F Y K T L R A E Q A S Q D V K N W M T  
F Y K T L R A E Q A S Q D V K N W M T  
F Y K T L R A E Q A S Q E V K T W M T



319 320 321 322 323 324 325 326 327 328 329 330 331 332 333 334 335 336 337

E T L L V Q N A N P D C K T I L R A L  
E T L L V Q N A N P D C K S I L R A L  
E T L L V Q N A N P D C K A I L K A L  
E T L L V Q N A N P D C K T I L K A L  
D T L L V Q N A N P D C K N I L R A L  
E T L L V Q N A N P D C K T I L K A L  
E T L L V Q N A N P D C K S I L R A L  
D T L M V Q N A N P D C K T I L R S L  
E T L L V Q N S N P D C K T I L K A L  
E T L L V Q N A N P D C K S I L R A L  
E T L L V Q N A N P D C K S I L R A L  
E T L L V Q N A N P D C K S I L R A L  
E T L L V Q N A N P D C K T I L K A L  
E T L L V Q N A N P D C K S I L R A L  
D T L L V Q N A N P D C K T I L K A L

E T L L V Q N A N P D C K S I L R A L  
E T L L V H N A N P D C K T I L K A L  
D T L L V Q N A N P D C K T I L R A L  
E T L L V Q N A N P D C K T I L K A L  
E T L L V Q N A N P D C K T I L K A L  
E T L L V Q N A N P D C K T I L K A L  
E T L L V Q N A N P D C K S I L K A L  
E T L L V Q N A N P D C K S I L R A L  
E T L L V Q N S N P D C K T I L K A L  
E T L L V Q N A N P D C K T I L K A L  
E T L L V Q N A N P D C K T I L K A L  
E T L L V Q N A N P D C K T I L K A L

E T L L I Q N A N P D C K T I L K A L  
E T L L V Q N A N P D C K T I L K A L  
E T L L V Q N A N P D C R T I L K A L  
E T L L V Q N A N P D C K T I L K A L  
E T L L V Q N A N P D C K T I L K A L  
E T L L I Q N A N P D C K S I L R A L  
E T L L V Q N A N P D C K T I L K A L  
E T L L V Q N A N P D C K T I L K A L  
E T L L V Q N A N P D C K T I L K A L  
E T L M V Q N A N P D C K S I L R A L  
E T L L V Q N A N P D C K T I L K A L  
E T L L V Q N S N P D C K T I L K A L  
E T L L V Q N A N P D C K T I L K A L

319 320 321 322 323 324 325 326 327 328 329 330 331 332 333 334 335 336 337

E T L L I Q H A N P D C K T I L K A L  
E T L L V Q N A N P D C K T I L R A L  
E T L L V Q N A N P D C K T I L K A L  
E T L L V Q N A N P D C K T I L K A L  
E T L L V Q N A N P D C K T I L K A L  
E T L L V Q N A N P D C R S I L K A L  
E T L L V Q N A N P D C K T I L K A L  
D T L L V Q N A N P D C K S I L R A L  
E T L L V Q N A N P D C K T I L K A L

E T L L V Q N A N P D C K T I L K A L  
E T L L V Q N A N P D C K T I L K A L  
E T L L V Q N A N P D C K T I L K A L  
E T L L V Q N S N P D C K T I L K A L  
E T L L V Q N A N P D C K T I L K A L

338 339 340 341 342 343 344 345 346 347 348 349 350 351 352 353 354 355 356

G P G A T L E E M M T A C Q G V G G P  
G T G A T L E E M M T A C Q G V G G P  
G Q G A T L E E M M T A C Q G V G G P  
G P A A T L E E M M T A C Q G V G G P  
G P G A S L E E M M T A C Q G V G G P  
G P A A T L E E M M T A C Q G V G G P  
G P G A T L E E M M T A C Q G V G G P  
G P A A T L E E M M T A C Q G V G G P  
G T G A T L E E M M T A C Q G V G G P  
G P G A T L E E M M T A C Q G V G G P  
G P G A T L E E M M T A C Q G V G G P  
G P A A T L E E M M T A C Q G V G G P  
G P G A T L E E M M T A C Q G V G G P  
G P G A T L E E M M T A C Q G V G G P

G P G A S L E E M M T A C Q G V G G P  
G P G A T L E E M M T A C Q G V G G P  
G P G A S L E E M M T A C Q G V G G P  
G Q G A T L E E M M T A C Q G V G G P  
G P A A T L E E M M T A C Q G V G G P  
G P A A T L E E M M T A C Q G V G G P  
G T G A T L E E M M T A C Q G V G G P  
G P G A T L E E M M T A C Q G V G G P  
G P A A T L E E M M T A C Q G V G G P  
G P A A T L E E M M T A C Q G V G G P  
G P A A T L E E M M T A C Q G V G G P  
G P G A S L E E M M T A C Q G V G G P

G P A A T L E E M M T A C Q G V G G P  
G P A A T L E E M M T A C Q G V G G P  
G P A A T L E E M M T A C Q G V G G P  
G P A A T L E E M M T A C Q G V G G P  
G P G A T L E E M M T A C Q G V G G P  
G P A A T L E E M M T A C Q G V G G P  
G P A A T L E E M M T A C Q G V G G P  
G P A A T L E E M M T A C Q G V G G P  
G P G A S L E E M M T A C Q G V G G P  
G P A A T L E E M M T A C Q G V G G P  
G P A A T L E E M M T A C Q G V G G P  
G P A A T L E E M M T A C Q G V G G P

338 339 340 341 342 343 344 345 346 347 348 349 350 351 352 353 354 355 356

G P G A T L E E M M T A C Q G V G G P  
G P S A P L E E M M T A C Q G V G G P  
G P A A T L E E M M T A C Q G V G G P  
G P A A T L E E M M T A C Q G V G G P  
G P A A T L E E M M T A C Q G V G G P  
G T G A T L E E M M T A C Q G V G G P  
G P A A T L E E M M S A C Q G V G G P  
G P G A T L E E M M T A C Q G V G G P  
G P A A T L E E M M T A C Q G V G G P

G P A A T L E E M M T A C Q G V G G P  
G P A A T L E E M M T A C Q G V G G P  
G P A A T L E E M M T A C Q G V G G P  
G P A A T L E E M M T A C Q G V G G P  
G P A A T L E E M M T A C Q G V G G P

357 358 359 360 361 362 363

S H K A R V L  
G H K A R V L  
G H K A R V L  
G H K A R V L  
S H K A R V L  
G H K A R V L  
G H K A R V L  
S H K A R V L  
G H K A R V L  
S H K A R V L  
G H K A R V L  
S H K A R V L  
G H K A R V L  
G H K A R V L  
G H K A R V L

G H K A R V L  
A H K A R V L  
S H K A R V L  
G H K A R V L  
G H K A R V L  
G H K A R V L  
S H K A R V L  
S H K A R V L  
S H K A R V L  
G H K A R V L  
G H K A R V L  
S H K A R V L  
G H K A R V L

G H K A R V L  
G H K A R V L  
G H K A R V L  
S H K A R V L  
S H K A R V L  
S H K A R V L  
S H K A R V L  
G H K A R V L  
G H K A R V L  
S H K A R V L  
G H K A R V L  
S H K A R V L  
S H K A R V L

357 358 359 360 361 362 363

G H K A R V L  
G H K A R V L  
G H K A R V L  
S H K A R V L  
G H K A R V L  
S H K A R V L  
G H K A R V L  
S H K A R V L  
G H K A R V L

S H K A R V L  
G H K A R V L  
G H K A R V L  
G H K A R I L  
S H K A R V L
